# Supplementary material for: Composition and niche-specific characteristics of microbial consortia colonizing Marsberg copper mine in the Rhenish Massif
Source: Copernicus journal article supplement (doi:10.5194/bg-19-4883-2022), 2022-10-19
Supplement: Supplementary file 1 [file bg-19-4883-2022-supplement.pdf]

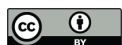

*Supplement of*

## **Composition and niche-specific characteristics of microbial consortia colonizing Marsberg copper mine in the Rhenish Massif**

**Sania Arif et al.**

*Correspondence to:* Sania Arif (sarif@gwdg.de)

The copyright of individual parts of the supplement might differ from the article licence.

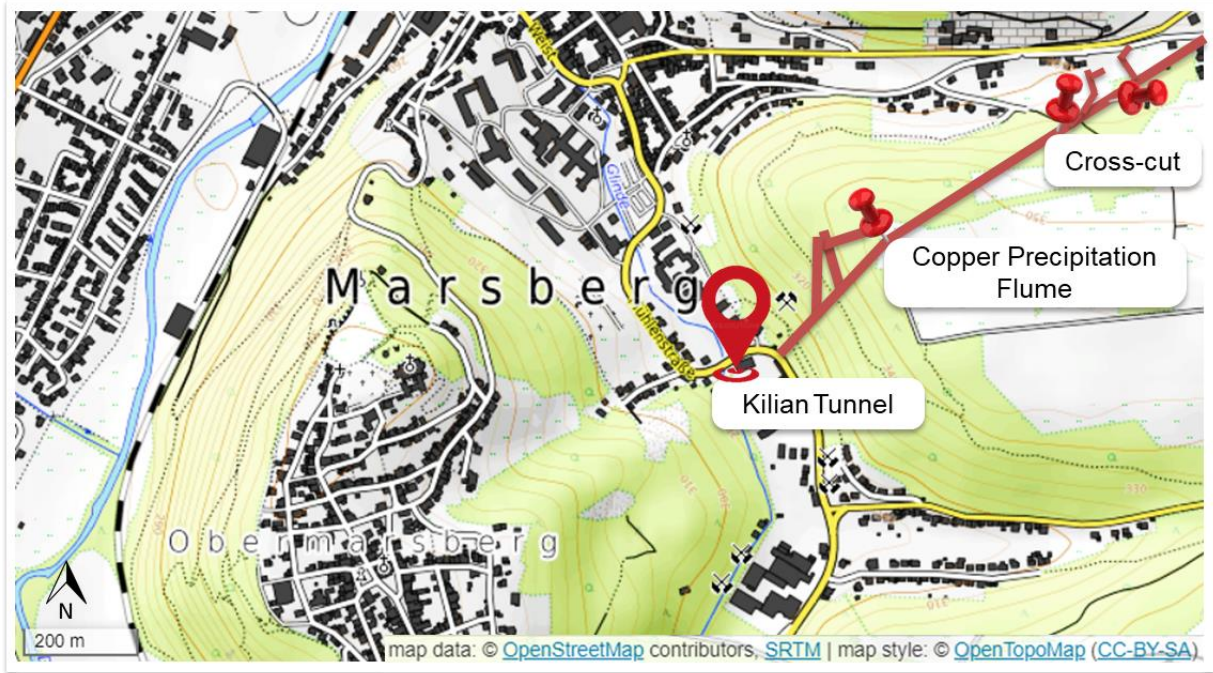

**Figure S1.** Map of sampling site (Kilianstollen, Marsberg) in the Rhenish Massif Mountain range. Reproduced with modifications from OpenTopoMap (<https://opentopomap.org>; CC BY-SA 3.0 (<https://creativecommons.org/licenses/by-sa/3.0/legalcode>)). Adits (simplified course) are indicated by red lines. Sampling sites are marked by red pushpins.

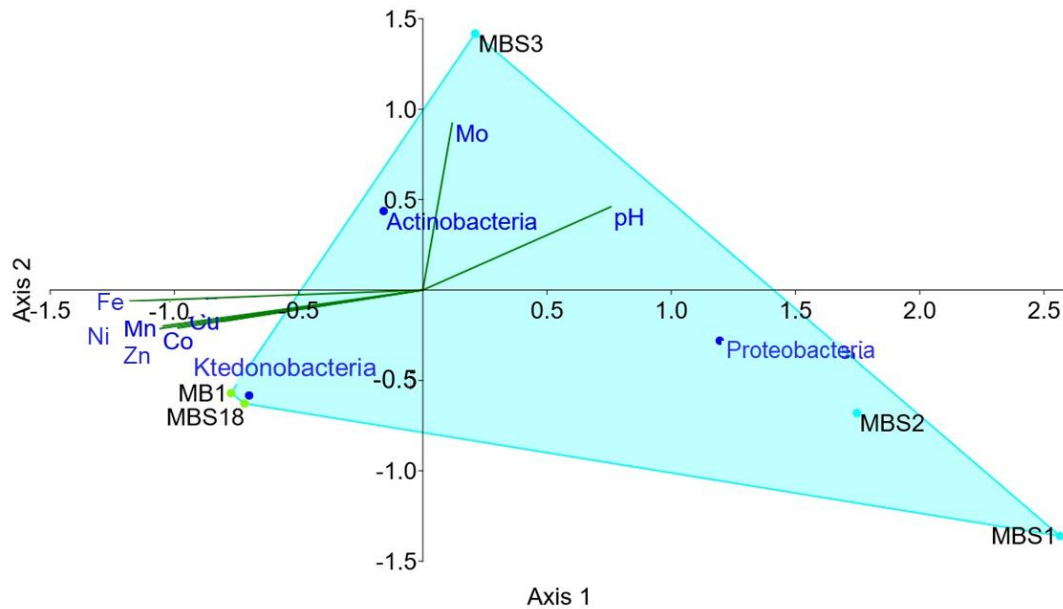

**Figure S2.** Canonical correspondence analysis of the biological samples collected at the leachate and spring water site. The heavy metals concentrations were taken as the abiotic factors against the abundance of *Proteobacteria*, *Actinobacteria*, and *Ktedonobacteria* for the representative of leachate (MB1, MBS18) and spring water (MBS1, MBS2, MBS3) groups.

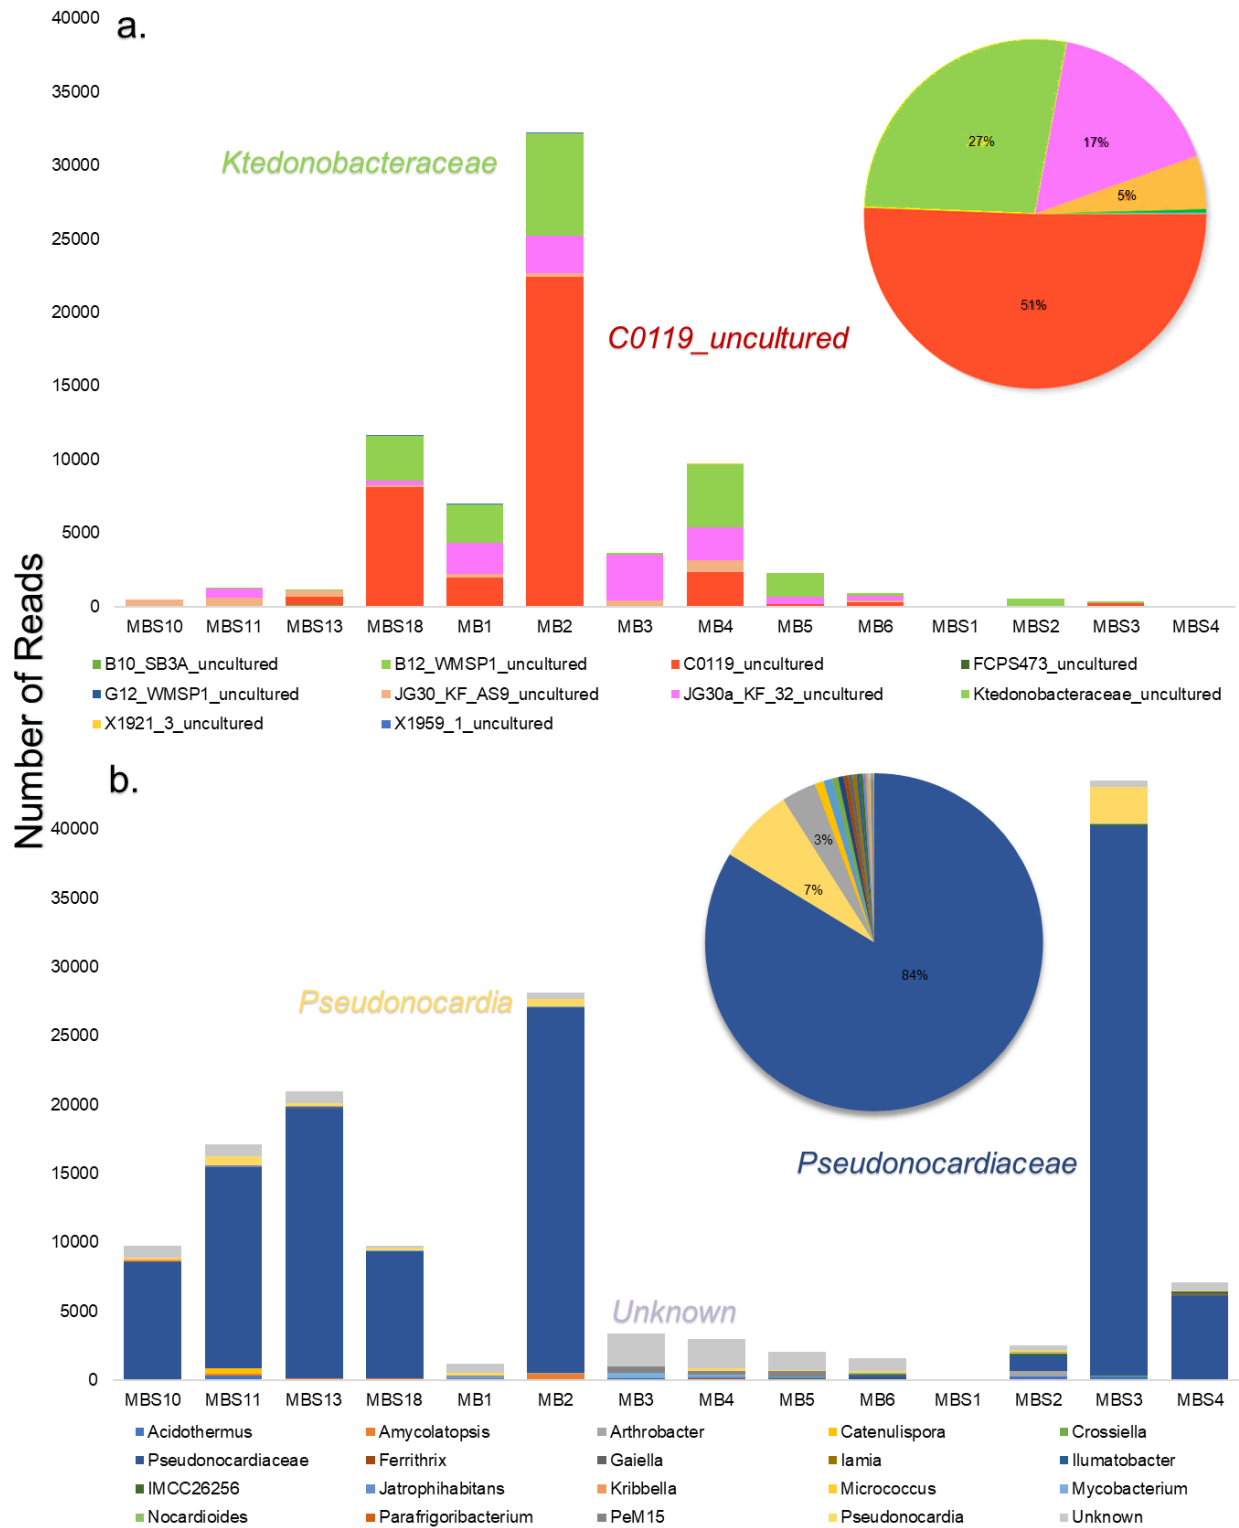

**Figure S3.** Actual abundance of *Ktedonobacteria* and *Actinobacteria* OTUs at genus level. The actual abundance of OTUs belonging to *Ktedonobacteria* (a) and *Actinobacteria* (b) class were observed at genus level, without any normalization, to analyse the low abundant OTUs. The pie chart insert shows the cumulative abundance of the major genus OTUs for all samples based on actual number of reads.

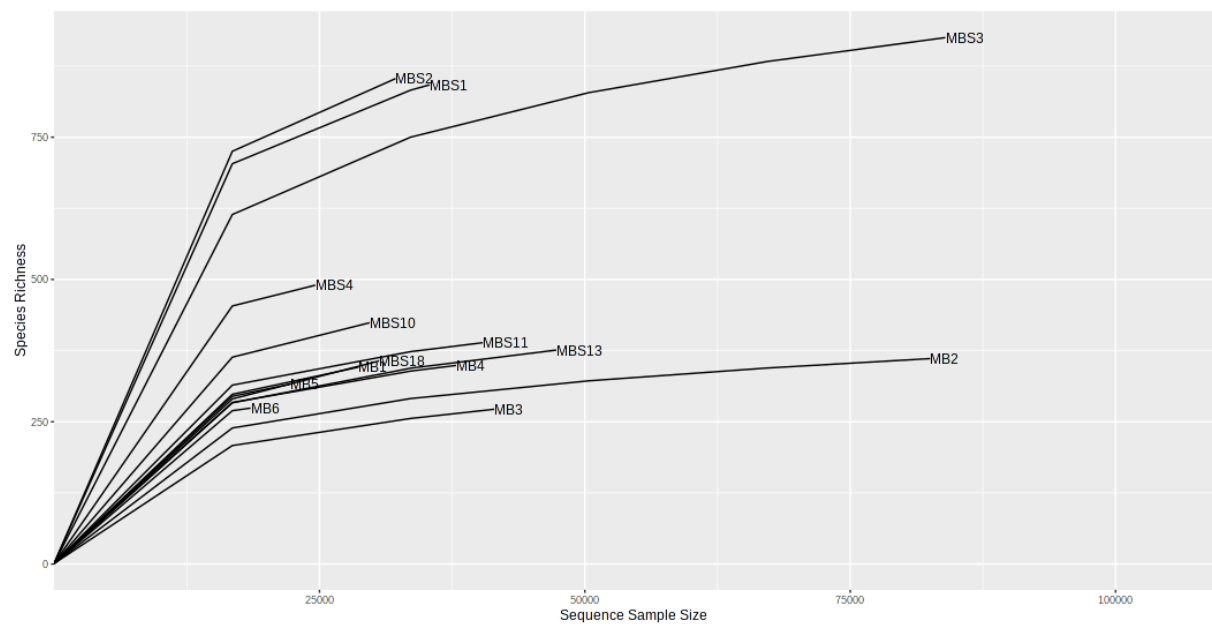

37

38 **Figure S4. Rarefaction Curve Analysis.** The samples are plotted in terms of OTUs observed (species richness)  
39 and sampled reads (sequence sample size).

40

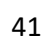

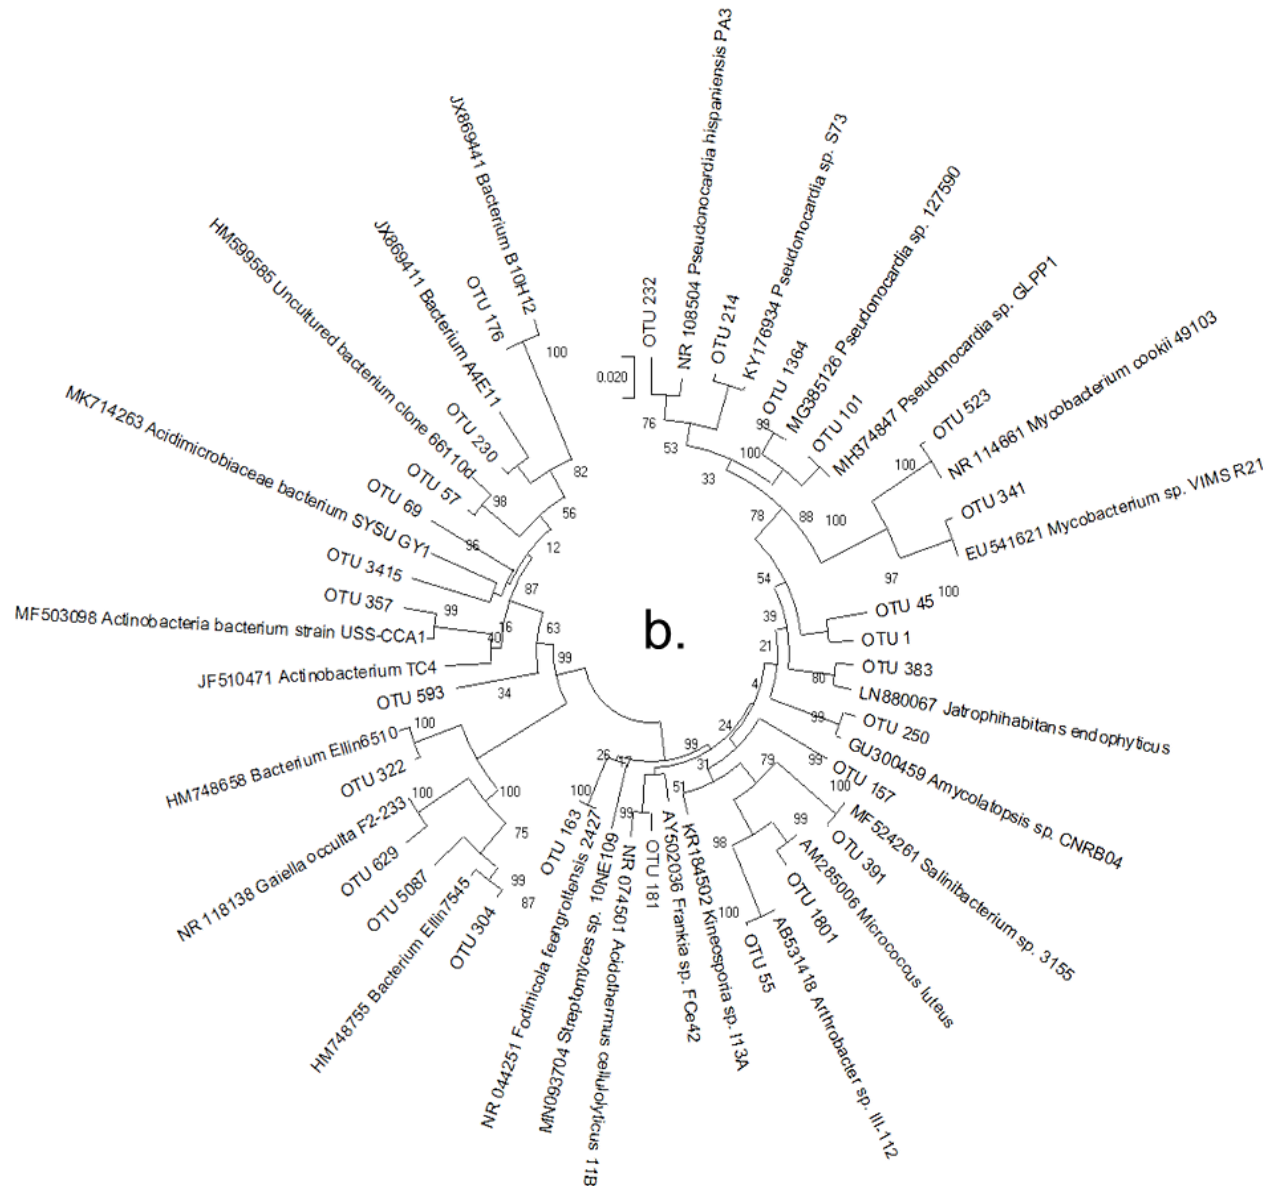

**Figure S5. Phylogenetic tree of the small subunit SSU ribosomal RNA genes of OTUs. *Ktedonobacteria* (a) and *Actinobacteria* (b).** Maximum-likelihood phylogenetic tree constructed based on V3-V4 amplicon sequences OTUs of *Ktedonobacteria* 16S rRNA gene (a) with the validly published *Ktedonobacteria* species. For the *Actinobacteria* class OTUs (b), the highest blast hits sequences were used. Bootstrap values are given at the branching points.



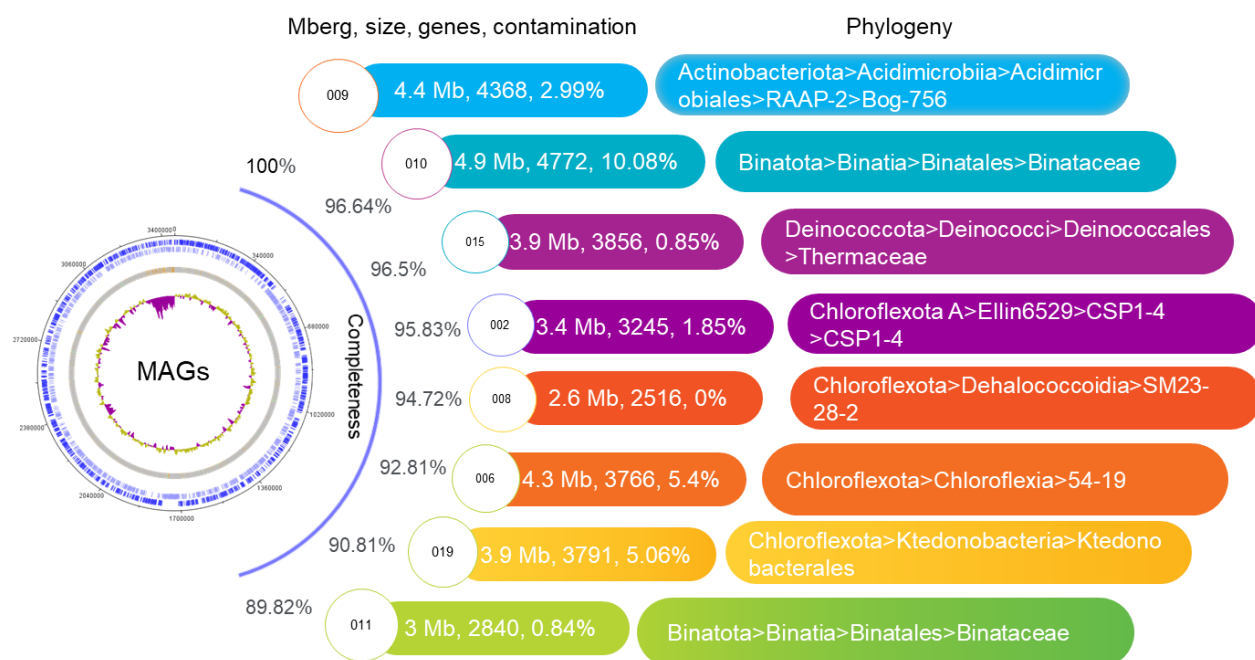

**Figure S6.** Overview of metagenome-assembled genomes and their key features

**Table S1.** Alpha diversity indexes of the Marsberg environmental samples

|                 | p-value: [ANOVA] | F-value  |
|-----------------|------------------|----------|
| Chao1           | 0.00030265       | 18.499   |
| ACE             | 0.0002466        | 19.409   |
| Shannon p-value | 0.025179         | 5.242    |
| Samples         | Shannon          | Chao1    |
| MBS10           | 3.510842108      | 560.25   |
| MBS11           | 3.192731872      | 463.375  |
| MBS13           | 3.035107497      | 452.1091 |
| MBS18           | 2.63632027       | 503.8723 |
| MBS1            | 3.819791427      | 1013.383 |
| MBS2            | 4.526088138      | 1002.609 |
| MBS3            | 3.207834475      | 1095.5   |
| MBS4            | 4.2432666        | 569.4727 |
| MB1             | 3.165745015      | 437.0227 |
| MB2             | 2.643642847      | 461.6364 |
| MB3             | 2.616643974      | 374.7    |
| MB4             | 3.276870267      | 438.3846 |
| MB5             | 3.312069095      | 397.2778 |
| MB6             | 3.709287532      | 317.24   |

53  
54  
55  
56

**Table S2. Analysis of molecular variance and unifrac analysis of the Marsberg samples**

**A. Unifrac.weighted**

| Tree | Groups | UWScore  | UWSig  |
|------|--------|----------|--------|
| 1    | L-M    | 0.953519 | 0.0970 |
| 1    | L-W    | 0.980299 | 0.0340 |
| 1    | M-W    | 0.981865 | 0.1450 |

**L Leachate M unconsolidated rocks W Spring water**

58  
59

**B. AMOVA (Analysis of Molecular Variance)**

| L-M-W                                   | Among    | Within   | Total   |
|-----------------------------------------|----------|----------|---------|
| SS                                      | 1.37542  | 2.93434  | 4.30976 |
| df                                      | 2        | 11       | 13      |
| MS                                      | 0.687712 | 0.266758 |         |
| Fs: 2.57803<br><i>p</i> -value: <0.001* |          |          |         |
| L-M                                     | Among    | Within   | Total   |
| SS                                      | 0.331903 | 1.82319  | 2.15509 |
| df                                      | 1        | 8        | 9       |
| MS                                      | 0.331903 | 0.227898 |         |
| Fs: 1.45637<br><i>p</i> -value: 0.077   |          |          |         |
| L-W                                     | Among    | Within   | Total   |
| SS                                      | 0.979114 | 2.52913  | 3.50824 |
| df                                      | 1        | 9        | 10      |
| MS                                      | 0.979114 | 0.281014 |         |
| Fs: 3.48422<br><i>p</i> -value: 0.002*  |          |          |         |
| M-W                                     | Among    | Within   | Total   |
| SS                                      | 0.738092 | 1.51637  | 2.25446 |
| df                                      | 1        | 5        | 6       |
| MS                                      | 0.738092 | 0.303274 |         |
| Fs: 2.43375<br><i>p</i> -value: 0.024   |          |          |         |



60

61 **Table S3. DESeq2 analysis of leachate, spring water and unconsolidated rocks at Phylum level**

|                     | <b>log2FC</b> | <b>lfcSE</b> | <b>Pvalues</b> | <b>FDR</b> |
|---------------------|---------------|--------------|----------------|------------|
| Cyanobacteria       | -6.6952       | 0.95446      | 2.31E-12       | 1.13E-10   |
| Deinococcus_Thermus | -25.413       | 3.84         | 3.64E-11       | 8.92E-10   |
| Epsilonbacteraeota  | 22.588        | 3.7255       | 1.34E-09       | 2.18E-08   |
| Chloroflexi         | -4.8682       | 0.95591      | 3.53E-07       | 4.32E-06   |
| Dependentiae        | -4.4792       | 0.99165      | 6.28E-06       | 6.15E-05   |
| Firmicutes          | 5.0962        | 1.1976       | 2.09E-05       | 0.00017    |
| Omnirothpicaeota    | 7.1101        | 2.4263       | 0.003385       | 0.023694   |
| Crenarchaeota       | 3.6381        | 1.3612       | 0.007525       | 0.04609    |
| Spirochaetes        | 2.6811        | 1.2503       | 0.032007       | 0.17426    |
| Verrucomicrobia     | 3.2298        | 1.7224       | 0.060765       | 0.29775    |
| Chlamydiae          | -1.7982       | 1.0282       | 0.080303       | 0.35772    |
| Dadabacteria        | 5.7891        | 3.5245       | 0.10048        | 0.37546    |
| Patescibacteria     | -1.4265       | 0.87188      | 0.1018         | 0.37546    |
| Elusimicrobia       | 3.5064        | 2.1809       | 0.10788        | 0.37546    |
| Acidobacteria       | -1.2842       | 0.81462      | 0.11494        | 0.37546    |
| Proteobacteria      | -0.62999      | 0.40834      | 0.12288        | 0.37631    |

62
